# Supplementary material
Source: PubMed Central journal article supplement (PMC3759748)
Supplement: NIHMS499917-supplement-Supplemental_Figures.pdf [file NIHMS499917-supplement-Supplemental_Figures.pdf]

## Supplementary material

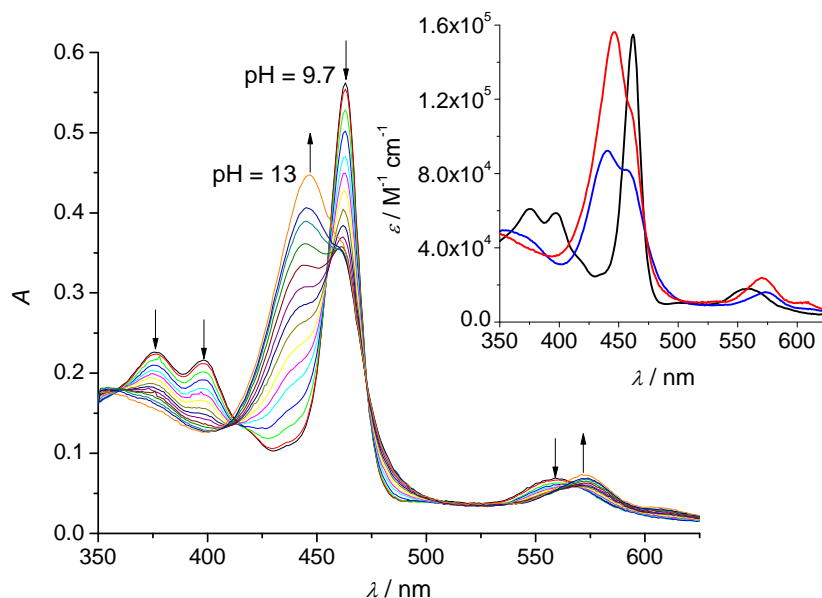

**Figure S1.** A typical titration profile of 3.6  $\mu\text{M}$   $\text{Mn}^{\text{III}}\text{TE-3-PyP}$  in 2 M  $\text{NaClO}_4$  with 0.2 M  $\text{NaOH}$  ( $\theta = 25\text{ }^\circ\text{C}$ ,  $l = 1\text{ cm}$ ). The pH values of the solution were varied within the pH-range 9.7-13 (for the sake of clarity not all measured spectra are shown). **Inset:** The theoretical spectra of the protonated, (—), mono-deprotonated (—), and double deprotonated (—) species.

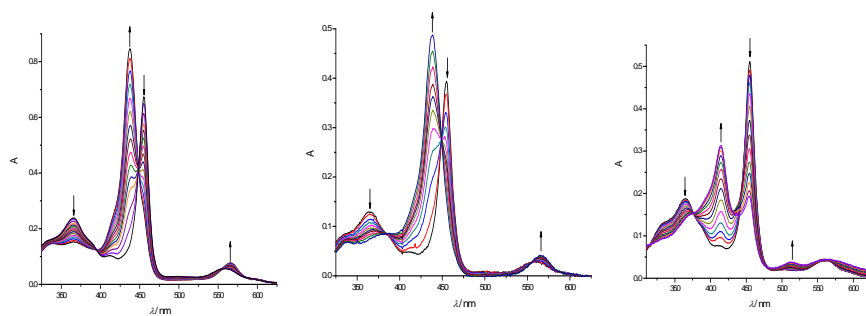

**Figure S2.** Time-dependent spectral changes of  $\text{Mn}^{\text{III}}\text{TE-2-PyP}$  in an anaerobic cell. **Left:** Condition:  $[\text{Mn}^{\text{III}}\text{TE-2-PyP}] = 49\text{ }\mu\text{M}$ , **pH = 8** (0.05 M  $\text{NaH}_2\text{PO}_4$ ),  $I = 0.1\text{ M}$  ( $\text{NaCl}$ ),  $\theta = 25\text{ }^\circ\text{C}$ ,  $l = 0.1\text{ cm}$ ,  $E_{\text{cell}} = -450\text{ mV vs. Ag/AgCl}$ . **Middle:** Condition:  $[\text{Mn}^{\text{III}}\text{TE-2-PyP}] = 29\text{ }\mu\text{M}$ , **pH = 4** (0.05M  $\text{CH}_3\text{COONa}$ ),  $I = 0.1\text{ M}$  ( $\text{NaCl}$ ),  $\theta = 25\text{ }^\circ\text{C}$ ,  $l = 0.1\text{ cm}$ ,  $E_{\text{cell}} = -450\text{ mV vs. Ag/AgCl}$ . **Right:** Condition:  $[\text{Mn}^{\text{III}}\text{TE-2-PyP}] = 37\text{ }\mu\text{M}$ , **pH = 1.5**,  $I = 0.1\text{ M}$  ( $\text{NaCl}$ ),  $\theta = 25\text{ }^\circ\text{C}$ ,  $l = 0.1\text{ cm}$ ,  $E_{\text{cell}} = -450\text{ mV vs. Ag/AgCl}$

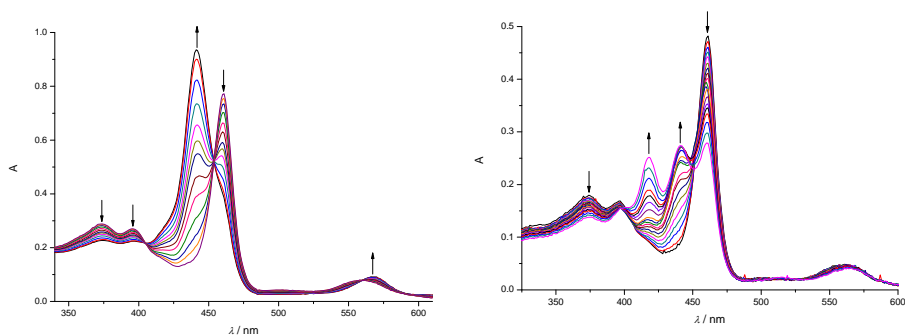

**Figure S3.** Time dependent spectral changes of  $\text{Mn}^{\text{III}}\text{TE-3-PyP}$  in an anaerobic cell. **Left:** Condition:  $[\text{Mn}^{\text{III}}\text{TE-3-PyP}] = 50 \mu\text{M}$ ,  $\text{pH} = 9$  ( $0.025\text{M Na}_2\text{B}_4\text{O}_7$ ),  $I = 0.1 \text{ M (NaCl)}$ ,  $\theta = 25 \text{ }^\circ\text{C}$ ,  $l = 0.1 \text{ cm}$ ,  $E_{\text{cell}} = -600 \text{ mV vs. Ag/AgCl}$ . **Right:** Condition:  $[\text{Mn}^{\text{III}}\text{TE-3-PyP}] = 31 \mu\text{M}$ ,  $\text{pH} = 4$  ( $0.05\text{M CH}_3\text{COONa}$ ),  $I = 0.1 \text{ M (NaCl)}$ ,  $\theta = 25 \text{ }^\circ\text{C}$ ,  $l = 0.1 \text{ cm}$ ,  $E_{\text{cell}} = -600 \text{ mV vs. Ag/AgCl}$ .

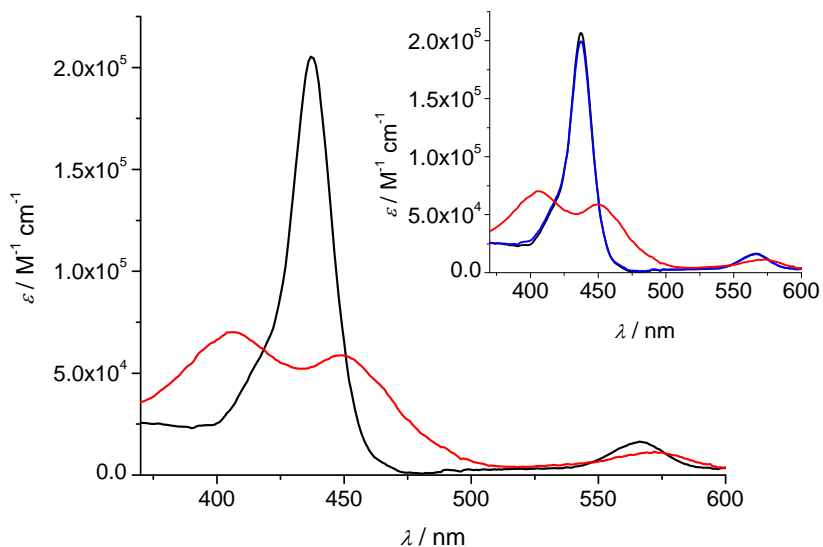

**Figure S4.** The theoretical spectra of the protonated (—) and deprotonated (—) species of  $\text{Mn}^{\text{III}}\text{TE-2-PyP}$  predicted according to the 2-species model. **Inset:** The theoretical spectra of the fully protonated (—), monodeprotonated (—), and fully deprotonated (—) species predicted according to the 3-species model.

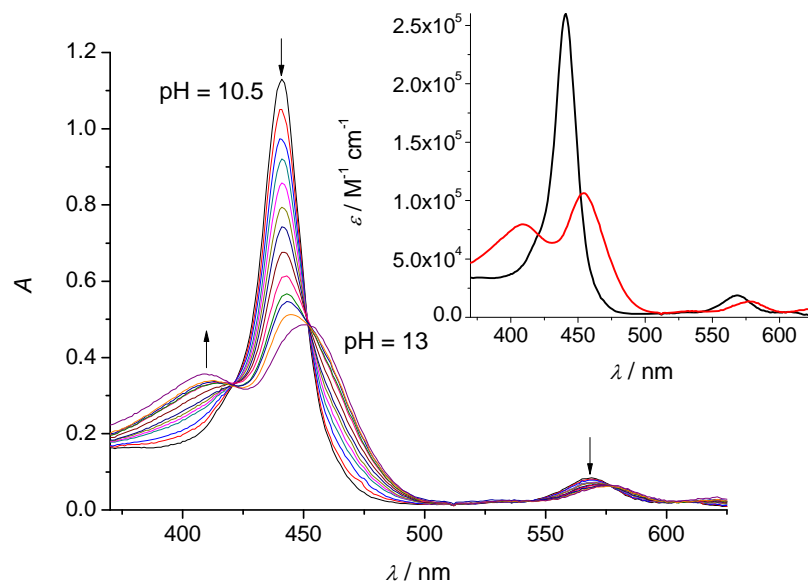

**Figure S5.** A typical titration profile of 4  $\mu\text{M}$   $\text{Mn}^{\text{II}}\text{TE-3-PyP}$  in 2 M  $\text{NaClO}_4$  with 0.2 M  $\text{NaOH}$  ( $\theta = 25$   $^\circ\text{C}$ ,  $l = 1$  cm). The pH values of solution were varied within the pH-range 10.5-13.0 (for the sake of clarity not all measured spectra are shown). **Inset:** The theoretical spectra of the protonated (—) and deprotonated (—) species predicted according to the 2-species model. Spectra obtained at  $\text{pH} < 10.5$  are shown in Figure S8.

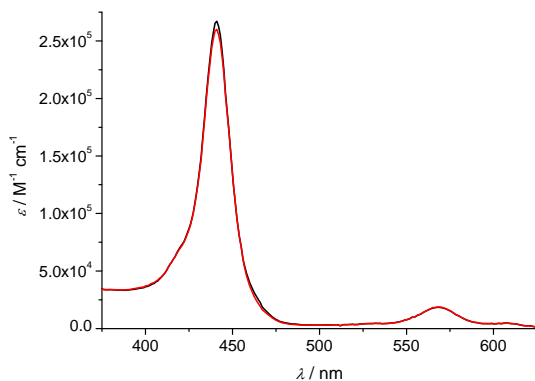

**Figure S6.** The theoretical spectra of  $\text{Mn}^{\text{II}}\text{TE-3-PyP}$  species obtained from the spectral changes observed in the spectroelectrochemical experiment at  $\text{pH} 9$  (—) and in the  $\text{pH}$ -titration of  $\text{Mn}^{\text{III}}\text{TE-3-PyP}^{5+}$  in the presence of ascorbic acid recorded at  $\text{pH} 10.5$ . (—).

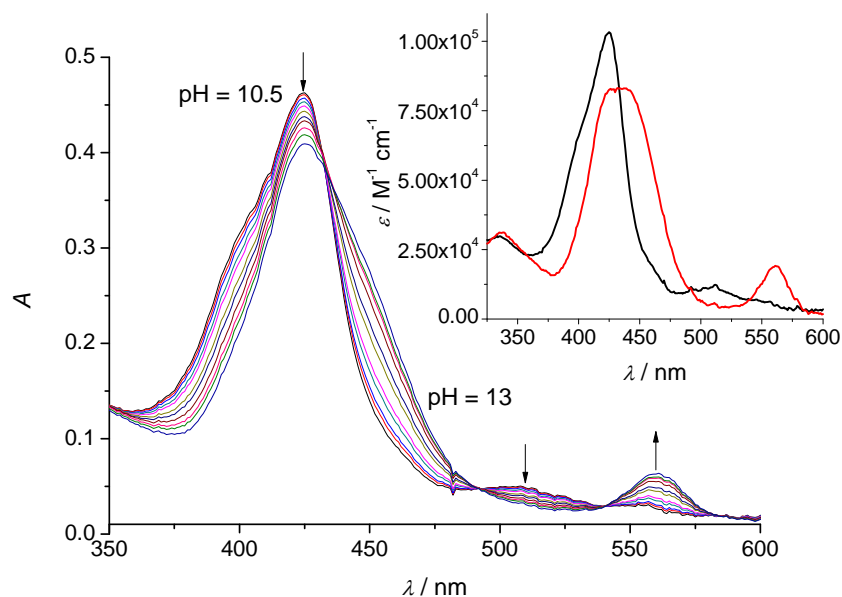

**Figure S7.** A typical titration profile of  $4.8 \mu\text{M Mn}^{\text{IV}}\text{TE-3-PyP}$  in  $2 \text{ M NaClO}_4$  with  $0.2 \text{ M NaOH}$  ( $\theta = 25 \text{ }^\circ\text{C}$ ,  $l = 1 \text{ cm}$ ) in the presence of  $0.1 \text{ mM } [\text{Mo}(\text{CN})_8]^{3-}$ . The pH values of the solution were varied within the pH-range 10.5-13. (for the sake of clarity not all measured spectra are shown). **Inset:** The theoretical spectra of the protonated (—) and deprotonated (—) species.

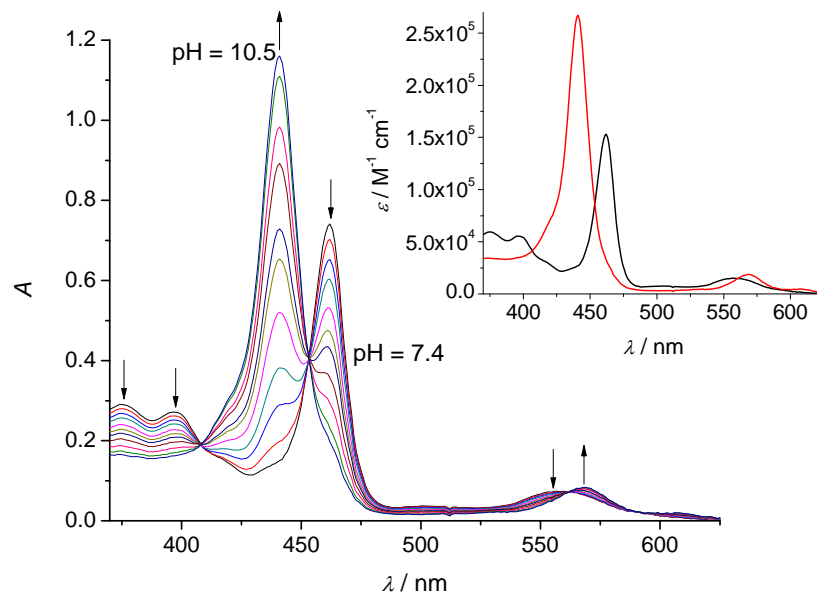

**Figure S8.** A typical titration profile of ( $4 \mu\text{M Mn}^{\text{III}}\text{TE-3-PyP} + 20 \text{ mM ascorbic acid} + 0.5 \text{ mM } [\text{Fe}(\text{CN})_6]^{3-}$ ) in  $2 \text{ M NaClO}_4$  with  $0.2 \text{ M NaOH}$  ( $\theta = 25 \text{ }^\circ\text{C}$ ,  $l = 1 \text{ cm}$ ). The pH values were varied within the pH-range 7.4-10.5 (for the sake of clarity not all measured spectra are shown). **Inset:** The theoretical spectra of  $(\text{H}_2\text{O})_2\text{Mn}^{\text{III}}\text{TE-3-PyP}^{5+}$  (—) and  $(\text{H}_2\text{O})_2\text{Mn}^{\text{II}}\text{TE-3-PyP}^{4+}$  (—).

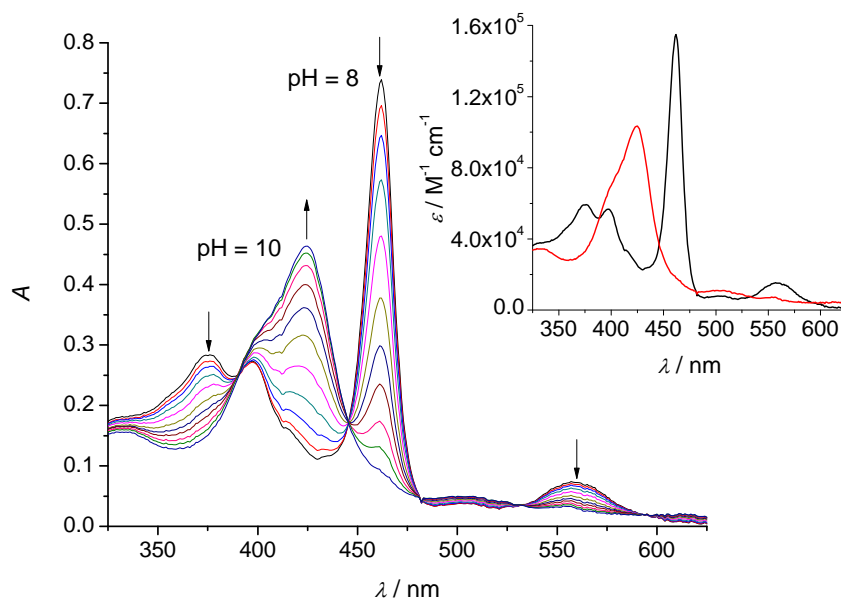

**Figure S9.** A typical titration profile of 4.8  $\mu\text{M}$   $\text{Mn}^{\text{III}}\text{TE-3-PyP}$  in 2 M  $\text{NaClO}_4$  with 0.2 M  $\text{NaOH}$  ( $\theta = 25^\circ\text{C}$ ,  $l = 1\text{ cm}$ ) in the presence of 0.1 mM  $[\text{Mo}(\text{CN})_8]^{3-}$  and 0.1 mM  $[\text{Mo}(\text{CN})_8]^{4-}$ . The pH values of the solution were varied within the pH-range 8-10 (for the sake of clarity not all measured spectra are shown). **Inset:** The theoretical spectra of the reduced (—) and oxidized forms of  $\text{MnTE-3-PyP}$  (—).

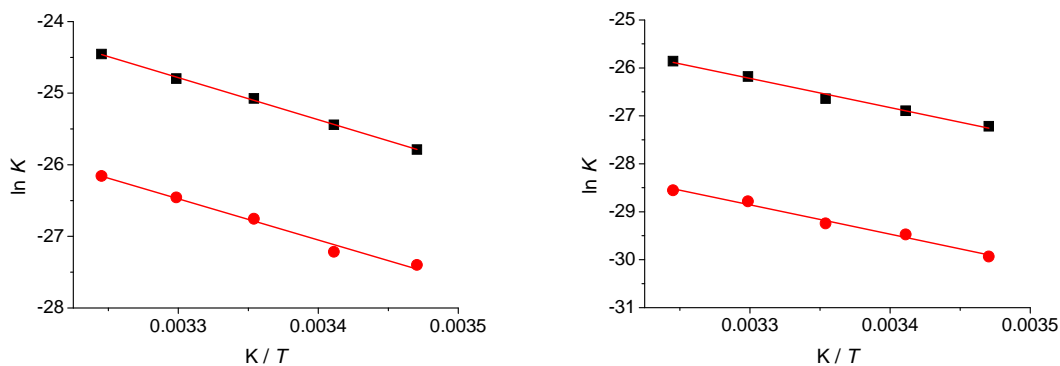

**Figure S10.** van't Hoff plots for deprotonation constants of  $\text{Mn}^{\text{III}}\text{Ps}$ ,  $K_{a1}$  (■) and  $K_{a2}$  (●),  $I = 2\text{ M}$  ( $\text{NaClO}_4$ ): **left:**  $\text{Mn}^{\text{III}}\text{TE-2-PyP}$ , **right:**  $\text{Mn}^{\text{III}}\text{TE-3-PyP}$ .

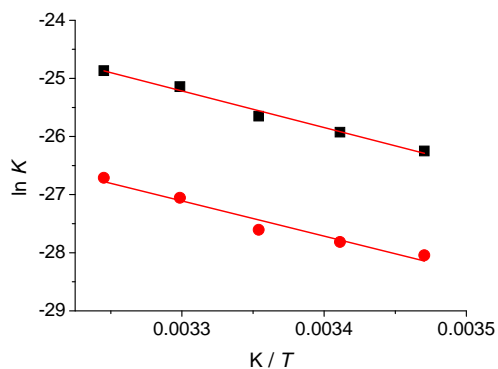

**Figure S11.** van't Hoff plots for deprotonation constants  $K'_{a1}$  of  $\text{Mn}^{\text{IV}}\text{Ps}$ ,  $I = 2\text{ M}$  ( $\text{NaClO}_4$ ):  $\text{Mn}^{\text{IV}}\text{TE-2-Pyp}$  (■),  $\text{Mn}^{\text{IV}}\text{TE-3-Pyp}$  (●).

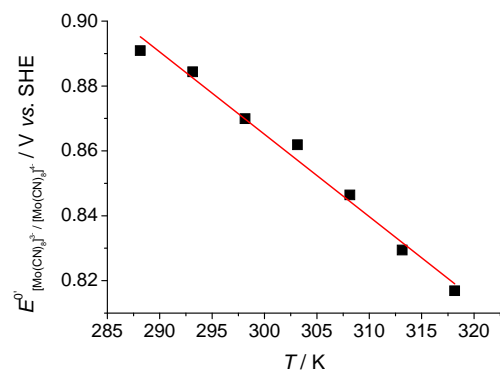

**Figure S12.** Temperature dependence of the formal potential for the reduction of 1 mM octacyanomolybdate,  $I = 2 \text{ M}$  ( $\text{NaClO}_4$ ).

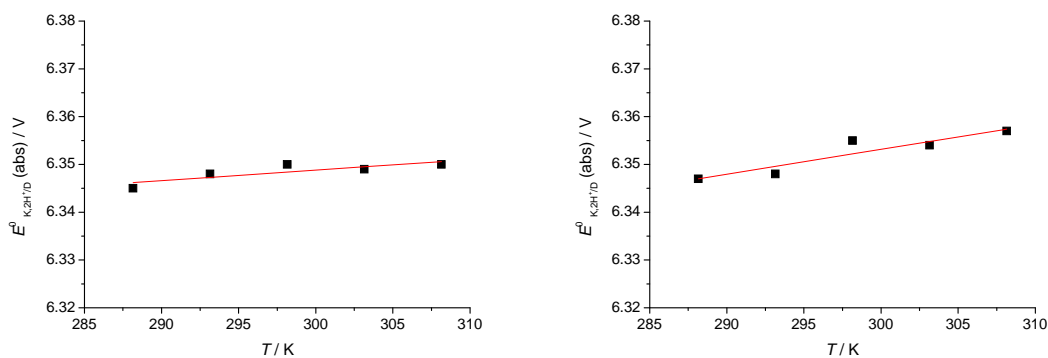

**Figure S13.** Temperature dependence of the formal potential for the redox couple  $\text{K}, 2\text{H}^+/\text{D}$ , as assigned in Scheme 1,  $I = 2 \text{ M}$  ( $\text{NaClO}_4$ ): **left:** MnTE-2-PyP, **right:** MnTE-3-PyP.

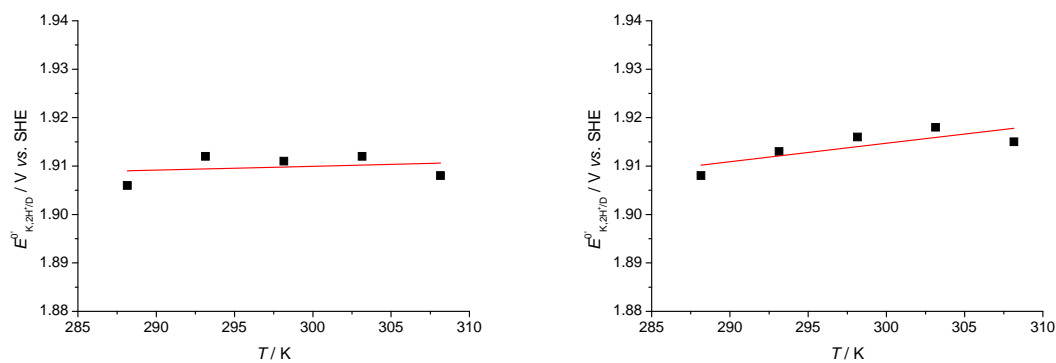

**Figure S14.** Temperature dependence of the formal potential for the redox couple  $\text{K}, 2\text{H}^+/\text{D}$  vs. SHE, as assigned in Scheme 1,  $I = 2 \text{ M}$  ( $\text{NaClO}_4$ ): **left:** MnTE-2-PyP, **right:** MnTE-3-PyP.

**Table S1.** Thermodynamic data for the accessible redox couples of the studied manganese porphyrin complexes obtained in 2 M NaClO<sub>4</sub>. The values were calculated from absolute redox potentials.

| Couple                                                                                  | Parameter               |                         |
|-----------------------------------------------------------------------------------------|-------------------------|-------------------------|
|                                                                                         | $\Delta H \pm \sigma^a$ | $\Delta S \pm \sigma^b$ |
| $(O)(H_2O)Mn^{IV}TE-2-PyP^{4+} + 2H^+ + e^- \rightarrow (H_2O)_2Mn^{III}TE-2-PyP^{5+}$  | $-606 \pm 2$            | $21 \pm 7$              |
| $(O)(H_2O)Mn^{IV}TE-2-PyP^{4+} + H^+ + e^- \rightarrow (OH)(H_2O)Mn^{III}TE-2-PyP^{4+}$ | $-557 \pm 5$            | $-23 \pm 10$            |
| $(O)(H_2O)Mn^{IV}TE-2-PyP^{4+} + e^- \rightarrow (O)(H_2O)Mn^{III}TE-2-PyP^{3+}$        | $-509 \pm 8$            | $-85 \pm 21$            |
| $(O)(OH)Mn^{IV}TE-2-PyP^{4+} + 2H^+ + e^- \rightarrow (OH)(H_2O)Mn^{III}TE-2-PyP^{5+}$  | $-609 \pm 8$            | $14 \pm 21$             |
| $(O)(H_2O)Mn^{IV}TE-3-PyP^{4+} + 2H^+ + e^- \rightarrow (H_2O)_2Mn^{III}TE-3-PyP^{5+}$  | $-598 \pm 4$            | $50 \pm 12$             |
| $(O)(H_2O)Mn^{IV}TE-3-PyP^{4+} + H^+ + e^- \rightarrow (OH)(H_2O)Mn^{III}TE-3-PyP^{4+}$ | $-547 \pm 7$            | $-1 \pm 21$             |
| $(O)(H_2O)Mn^{IV}TE-3-PyP^{4+} + e^- \rightarrow (O)(H_2O)Mn^{III}TE-3-PyP^{3+}$        | $-496 \pm 10$           | $-73 \pm 32$            |
| $(O)(OH)Mn^{IV}TE-3-PyP^{4+} + 2H^+ + e^- \rightarrow (OH)(H_2O)Mn^{III}TE-3-PyP^{5+}$  | $-597 \pm 13$           | $58 \pm 40$             |

<sup>a</sup> Reaction enthalpies are given in kJ mol<sup>-1</sup>. <sup>b</sup> Reaction entropies are given in J K<sup>-1</sup> mol<sup>-1</sup>.

**Table S2.** The formal reduction potentials vs. SHE for all experimentally available redox couples assigned as in Scheme 1, obtained by the spectrophotometric pH titrations at  $\theta = 25$  °C,  $I = 2$  M (NaClO<sub>4</sub>).

| Mn <sup>X</sup> /Mn <sup>X-1</sup> | Redox couple         | $E^{0'}/V$ |            |                           |
|------------------------------------|----------------------|------------|------------|---------------------------|
|                                    |                      | MnTE-2-PyP | MnTE-3-PyP | MnTnBu-2-PyP <sup>a</sup> |
| Mn(III)/Mn(II)                     | D/B,H <sup>+</sup>   | -0.550     | -0.764     | -0.506                    |
|                                    | E,H <sup>+</sup> /A  | +0.789     | +0.632     | +0.875                    |
|                                    | F,2H <sup>+</sup> /A | +1.477     | +1.384     | +1.604                    |
|                                    | F,H <sup>+</sup> /B  | +0.782     | +0.671     | +0.895                    |
| Mn(IV)/Mn(III)                     | K,2H <sup>+</sup> /D | +1.910     | +1.915     | +1.800                    |
|                                    | K,H <sup>+</sup> /E  | +1.266     | +1.231     | +1.128                    |
|                                    | L,3H <sup>+</sup> /D | +2.569     | +2.624     | +2.497                    |
|                                    | L,2H <sup>+</sup> /E | +1.925     | +1.940     | +1.825                    |
|                                    | L,H <sup>+</sup> /F  | +1.237     | +1.189     | +1.095                    |
| Mn(IV)/Mn(II)                      | K/A,2H <sup>+</sup>  | +1.028     | +0.932     | +1.002                    |
|                                    | L/A,3H <sup>+</sup>  | +0.680     | +0.575     | +0.647                    |
|                                    | K/B,H <sup>+</sup>   | +1.357     | +1.286     | +1.350                    |
|                                    | K/B,2H <sup>+</sup>  | +1.009     | +0.930     | +0.995                    |

<sup>a</sup> Values taken from Reference 13.
